# Supplementary material for: Methods to increase sample transport efficiency in single particle inductively coupled plasma mass spectrometry when analyzing nanoparticles
Source: Royal Society of Chemistry journal article supplement (doi:10.1039/d0ja00089b), 2020-01-01
Supplement: d0ja00089b1.pdf [file d0ja00089b1.pdf]

**Electronic supplementary information for**  
**Methods to increase sample transport efficiency of single particle inductively coupled**  
**plasma mass spectrometry when analyzing nanoparticles**

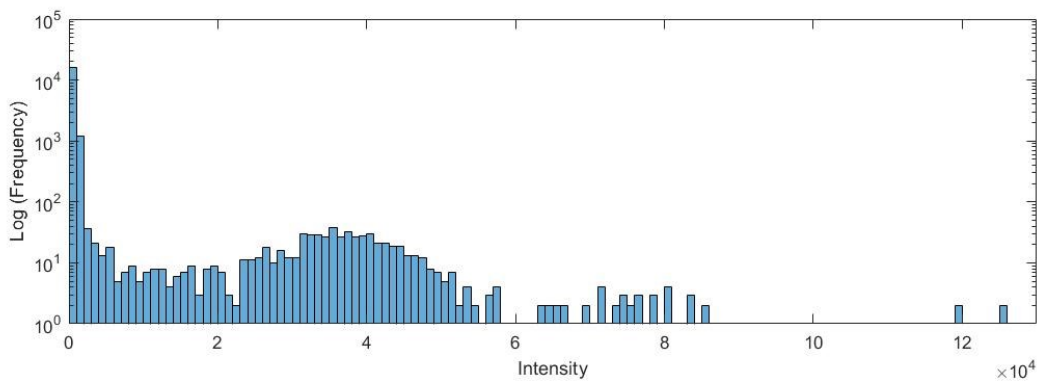

**Fig. S1** Raw intensities histogram obtained by spICPMS at room temperature

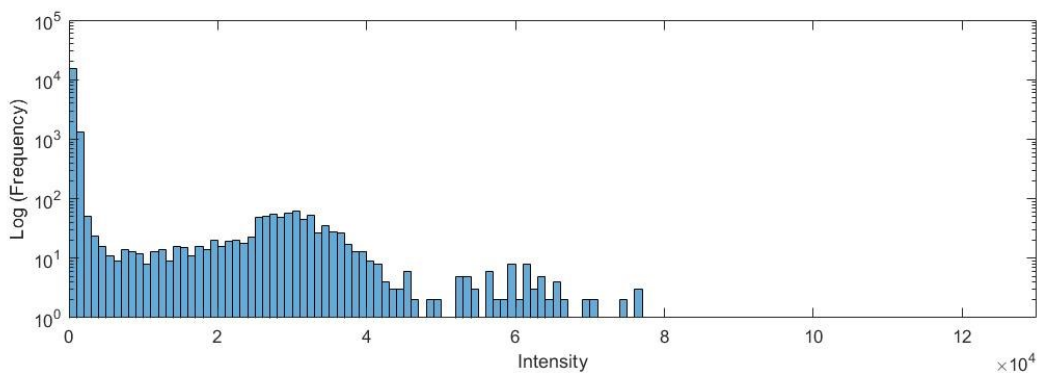

**Fig. S2** Raw intensities histogram obtained by spICPMS at 60 °C

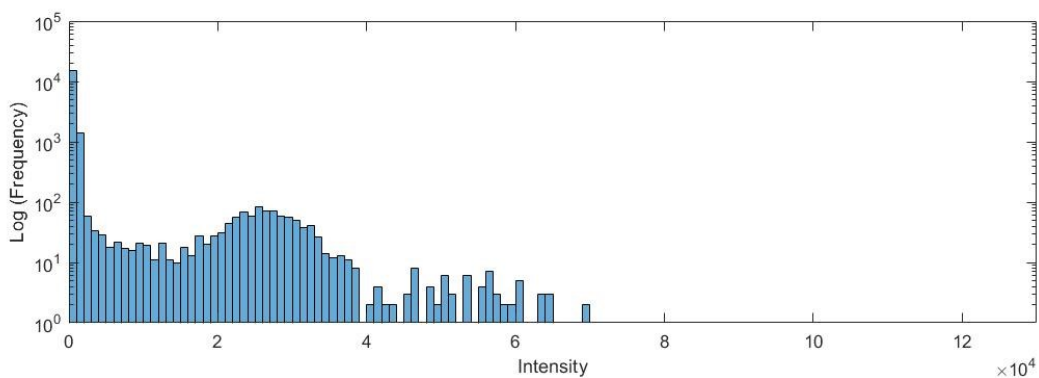

**Fig. S3** Raw intensities histogram obtained by spICPMS at 80 °C

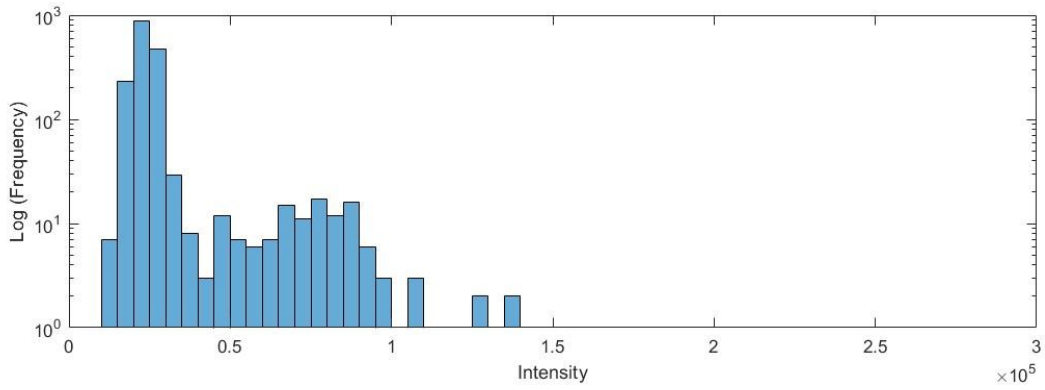

**Fig. S4** Raw intensities histogram obtained by MSFA-spICPMS at room temperature

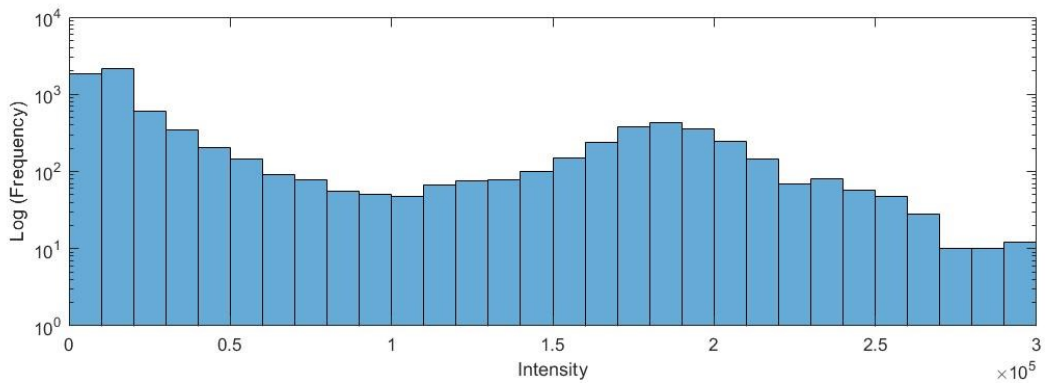

**Fig. S5** Raw intensities histogram obtained by MSFA-spICPMS at  $60^\circ\text{C}$
